# Supplementary material for: Snail Slime Extracted by a Cruelty Free Method Preserves Viability and Controls Inflammation Occurrence: A Focus on Fibroblasts
Source: MDPI journal article supplement (doi:10.3390/molecules28031222), 2023-01-26
Supplement: s1 [file s1]

Table S1: Technical data sheet of microfiltered snail slime

Origin – origin of the molluscs: from farms in Italy, EU and non-EU following the Disciplinary “Cherasco Snail Breeding Method\* “.

|                                                                                                                                                                                               |                                                                                                                                                                                                                               |
|-----------------------------------------------------------------------------------------------------------------------------------------------------------------------------------------------|-------------------------------------------------------------------------------------------------------------------------------------------------------------------------------------------------------------------------------|
| <b>Ingredients (INCI)</b>                                                                                                                                                                     |                                                                                                                                                                                                                               |
|                                                                                                                                                                                               | Snail Secretion Filtrate, Citric Acid, Sodium Benzoate, Potassium Sorbate.                                                                                                                                                    |
| <b>Reach</b>                                                                                                                                                                                  |                                                                                                                                                                                                                               |
| Snail Slime                                                                                                                                                                                   | N.D.                                                                                                                                                                                                                          |
| Sodium Benzoate                                                                                                                                                                               | 01-2119460683-35-0000                                                                                                                                                                                                         |
| Potassium sorbate                                                                                                                                                                             | N.D.                                                                                                                                                                                                                          |
| Citric Acid F.U.                                                                                                                                                                              | 01-2119457026-42                                                                                                                                                                                                              |
| E 330                                                                                                                                                                                         |                                                                                                                                                                                                                               |
| <b>Quantitative Formula</b>                                                                                                                                                                   |                                                                                                                                                                                                                               |
| RAW MATERIALS                                                                                                                                                                                 | %                                                                                                                                                                                                                             |
| SNAIL SECRETION<br>FILTRATE CITRIC<br>ACID                                                                                                                                                    | A                                                                                                                                                                                                                             |
| SODIUM BENZOATE                                                                                                                                                                               | G                                                                                                                                                                                                                             |
| POTASSIUM SORBATE                                                                                                                                                                             | 0,20                                                                                                                                                                                                                          |
|                                                                                                                                                                                               | 0,20                                                                                                                                                                                                                          |
| WE COMMUNICATE THE RANGE ACCORDING TO THE STATEMENTS FDA CRMCS (Food and Drug Administration Composition Statement): A>50%; 25%<B<=50%; 10%<C<=25%; 5%<D<=10%; 1%<E<=5%; 0,1%<F<=1%; G<=0,02% |                                                                                                                                                                                                                               |
| <b>Organoleptic characteristics</b>                                                                                                                                                           |                                                                                                                                                                                                                               |
| Appearance                                                                                                                                                                                    | Partially viscous liquid, transparent to slight opalescent. The appearance of the liquid, due to the peculiarities of the product, is characterized by the presence of viscous material that is defined as a possible natural |

|                                                                                                                                                                 |                                                                                                                           |                                      |             |
|-----------------------------------------------------------------------------------------------------------------------------------------------------------------|---------------------------------------------------------------------------------------------------------------------------|--------------------------------------|-------------|
| Colour                                                                                                                                                          | deposit and certifies its quality.                                                                                        |                                      |             |
| Smell                                                                                                                                                           | Color from light to slightly straw yellow. Natural tendency to darken in case of oxidation.                               |                                      |             |
|                                                                                                                                                                 | Characteristic acidulous (spiritual aroma).                                                                               |                                      |             |
| * <a href="https://www.istitutodiellici-coltura.it/en/snail-rules-and-regulations/">https://www.istitutodiellici-coltura.it/en/snail-rules-and-regulations/</a> |                                                                                                                           |                                      |             |
| <b>Chemical - Physical characteristics</b>                                                                                                                      |                                                                                                                           |                                      |             |
| Solubility                                                                                                                                                      | soluble in water, in hydroalcoholic (limited), hydroalcoholic, hydroglyceric and surfactant solutions, insoluble in oils. |                                      |             |
| pH                                                                                                                                                              | 2,60 – 4,00                                                                                                               | pH meter                             | Unità di pH |
| Density                                                                                                                                                         | 1,00 – 1,30                                                                                                               | Densimeter                           | g/ml        |
| Refractive index                                                                                                                                                | 1335- 1345                                                                                                                | Refractometry                        |             |
| Dry residue (105°C, 1h)                                                                                                                                         | 1,4 – 6,0                                                                                                                 | UNI Iso 5725-5:2004 e ISO 13528:2005 | g/100g      |
| Hydroxyproline                                                                                                                                                  | 0,3 – 0,8                                                                                                                 | M.I.M. Rev. 0:2016                   | 011216/ H   |
| Collagen                                                                                                                                                        | 2,0 – 2,6                                                                                                                 | ISO 3496:1994                        | % m/m       |
| Protein                                                                                                                                                         | 0,050 – 0,20                                                                                                              | ISO1871:2009                         | g/100g      |
| Mucopolysaccharides                                                                                                                                             | 1,0 – 2,0                                                                                                                 | Gravimetry                           | g/100 g     |
| Elastin                                                                                                                                                         | 0,50 -0,60                                                                                                                | J.Chrom. A, 1322, 99, 49-53, 2013    | %           |
| Glycolic acid                                                                                                                                                   | 12520                                                                                                                     | J.Chrom. A, 1322, 99, 49-53, 2013    | mg/kg       |
| Allantoin                                                                                                                                                       | 527                                                                                                                       | J.Chrom. A, 1322, 99, 49-53, 2013    | mg/kg       |
| Magnesium (Mg)                                                                                                                                                  | 515                                                                                                                       | M.I.M 110315/A Rev.0:2015            | mg/kg       |
| D-lactic acid                                                                                                                                                   | <10,0                                                                                                                     | M.I.M. 01216/A RREV: 0:2016          | mg/kg       |
| L-lactic acid                                                                                                                                                   | <10,0                                                                                                                     | M.I.M. 01216/A RREV: 0:2016          | mg/kg       |
| Antiprotease                                                                                                                                                    | 0,50 – 1,50                                                                                                               | M.I.M. 01216/A RREV: 0:2016          | mU/l        |
| Manganese (Mn)                                                                                                                                                  | <1                                                                                                                        | M.I.M. 110315/A Rev. 0:2015          | mg/kg       |

|                                        |            |                                 |         |
|----------------------------------------|------------|---------------------------------|---------|
| Vitamin B1 (Thiamine)                  | 0,70 – 1,0 | M.I.M. 010611/A rev. 0:2011     | mg/kg   |
| Vitamin A                              | 25 - 35    | ISTISAN 96/34 pag. 137          | u.i./kg |
| Vitamin C                              | 0,05 – 0,1 | M.I.M. 050911/A Rev. 0:2011     | mg/kg   |
| Vitamin E                              | 0,4 – 0,8  | ISTISAN 96/34 pag. 137          | mg/kg   |
| Vitamin B6                             | 25 - 35    | ISTISAN 96/34 pag. 137          | mg/kg   |
| <b>Microbiological characteristics</b> |            |                                 |         |
| Mesophile aerobic bacteria counter     | <10        | UNI EN ISO 21149:2017           | UFC/g   |
| Yeast counter                          | <10        | UNI EN ISO 1612:2017            | UFC/g   |
| Mould counter                          | <10        | UNI EN ISO 1612:2017            | UFC/g   |
| <i>Candida albicans</i>                | Absent     | UNI EN ISO 18416:2016+ec 1-2017 | UFC/g   |
| <i>Escherichia coli</i>                | Absent     | UNI EN ISO 21150:2016           | UFC/g   |
| <i>Staphylococcus aureus</i>           | Absent     | UNI EN ISO 22718:2016           | UFC/g   |
| <i>Salmonella</i> in 10 gr<br>Ph.Eur   | Absent     | Ph. Eur. 2.6.13 curr.ed.        | In 10 g |
| <i>Listeria monocytogenes</i> in 10 gr | Absent     | UNI EN ISO 11290-1:2017         | In 10 g |
| <i>Pseudomonas aeruginosa</i>          | Absent     | UNI EN ISO 22717:2016           | UFC/g   |
| <b>Determination of Heavy Metals</b>   |            |                                 |         |
| Arsenic (As)                           | <1         | ICP-MS                          | mg/kg   |
| Cadmium (Cd)                           | <1         | ICP-MS                          | mg/kg   |
| Cobalt (Co)                            | <1         | ICP-MS                          | mg/kg   |
| Total Chromium                         | <1         | ICP-MS                          | mg/kg   |
| Mercury (Hg)                           | <1         | ICP-MS                          | mg/kg   |

|                                                 |                                                                                                                                                                                                                                                                                           |                               |       |
|-------------------------------------------------|-------------------------------------------------------------------------------------------------------------------------------------------------------------------------------------------------------------------------------------------------------------------------------------------|-------------------------------|-------|
| Nichel (Ni)                                     | <1                                                                                                                                                                                                                                                                                        | ICP-MS                        | mg/kg |
| Lead (Pb)                                       | <1                                                                                                                                                                                                                                                                                        | ICP-MS                        | mg/kg |
| Antimony (Sb)                                   | <1                                                                                                                                                                                                                                                                                        | ICP-MS                        | mg/kg |
| Declaration                                     |                                                                                                                                                                                                                                                                                           |                               |       |
|                                                 | We declare that in the raw material called snail slime there are no:<br>Substances C.M.R.<br>NANOMATERIAL Substances O.G.M.<br>BSE / TSE substances IONIZING SUBSTANCES RESIDUAL SOLVENTS (excluding water).<br>We declare that the raw material called snail slime is: NO ANIMAL TESTING |                               |       |
| Allergen                                        |                                                                                                                                                                                                                                                                                           |                               |       |
|                                                 | Free from cosmetic allergens (Dir. 2003/15/EC and its amendments).                                                                                                                                                                                                                        |                               |       |
|                                                 | Does not contain gluten.                                                                                                                                                                                                                                                                  |                               |       |
| Shelf – life Conservation                       | 18 Months                                                                                                                                                                                                                                                                                 |                               |       |
| Product type                                    | The product is stable under the following conditions: away from light and heat sources.<br>Storage slime at ambient temperature.<br>Do not freeze.                                                                                                                                        |                               |       |
|                                                 | Suitable for cosmetic use.                                                                                                                                                                                                                                                                |                               |       |
| Snail slime technical data sheet Helix          | Emitted the 26/03/2022                                                                                                                                                                                                                                                                    | Rev.17                        |       |
| Verified, approved                              | Direction: Lumacheria Italiana s.r.l.                                                                                                                                                                                                                                                     | Signature: Quality Department |       |
| Snail slime technical data sheet Helix          | Emitted the 26/03/2022                                                                                                                                                                                                                                                                    | Rev.17                        |       |
| Verified, approved                              | Direction: Lumacheria Italiana s.r.l.                                                                                                                                                                                                                                                     | Signature: Quality Department |       |
| How to use – Disposal of the product – Warnings |                                                                                                                                                                                                                                                                                           |                               |       |
| How to use                                      | Handling and use within compliant GMP premises is recommended. Personnel must be qualified. Avoid external                                                                                                                                                                                |                               |       |

|                              |                                                                                                                                                                                                                                                                                                                                                                                                                                                                                                                                                                                     |
|------------------------------|-------------------------------------------------------------------------------------------------------------------------------------------------------------------------------------------------------------------------------------------------------------------------------------------------------------------------------------------------------------------------------------------------------------------------------------------------------------------------------------------------------------------------------------------------------------------------------------|
|                              | contamination such as food, drink, smoking. At the end of processing, close the cap firmly and keep as indicated at the point of storage.                                                                                                                                                                                                                                                                                                                                                                                                                                           |
| Disposal of the product      | <p>Snail slime secretion is considered to be a category 3 animal by-product within the meaning of Reg. (EC) 1069/2009. In case of contamination with external agents it is necessary to carry out the disposal according to the category of the contaminant.</p> <p>Do not reuse the original containers. The empty container must be disposed of according to the current standard.</p>                                                                                                                                                                                            |
| Warnings                     | <p>Keep in closed containers, away from light and moisture.</p> <p>Exposure to temperatures above 40 °C irreversibly degrades the active components of the product.</p>                                                                                                                                                                                                                                                                                                                                                                                                             |
| <b>Transport Information</b> |                                                                                                                                                                                                                                                                                                                                                                                                                                                                                                                                                                                     |
|                              | The product is not to be considered dangerous pursuant to the provisions in force on the transport of goods by road (A.D.R.), by rail (R.I.D.), by sea (I.M.D.G.) and by air                                                                                                                                                                                                                                                                                                                                                                                                        |
| <b>Conclusion</b>            |                                                                                                                                                                                                                                                                                                                                                                                                                                                                                                                                                                                     |
|                              | <p>The information contained in this page corresponds to the best of our knowledge at the time of printing. The present document shall be used to provide information on the safe use of the product indicated regarding transport, storage, processing and disposal. The indications are not valid for other products. If the product is mixed with other materials or is processed, the indications contained in the card lose value and it will be the responsibility of the final product manager to develop a new technical and safety data sheet for the new formulation.</p> |

Table S2: Methods used for the analysis and characterization of microfiltered snail slime quality.

| LUMACHERIA ITALIANA SRL CORSO L. EINAUDI, 40 - 12062 CHERASCO (Cuneo) | <b>ANNEX 1:</b><br><b><u>Snail slime analysis plan for cosmetic use</u></b><br><b>Year 2022</b><br>Rev 03 - 17/03/2022 |
|-----------------------------------------------------------------------|------------------------------------------------------------------------------------------------------------------------|
| <i>Description</i>                                                    | <i>Method</i>                                                                                                          |
| <b>TOTAL MICROBIAL COUNT</b>                                          |                                                                                                                        |
| Aerobic Mesoli Bacteria Count                                         | UNI EN ISO 21149:2017                                                                                                  |
| Yeast Counter                                                         | UNI EN ISO 16212:2017                                                                                                  |
| Mold Counter                                                          | UNI EN ISO 16212:2017                                                                                                  |
| Search for Pseudomonas aeruginosa                                     | UNI EN ISO 22717: 2016                                                                                                 |
| Search for Staphylococcus aureus                                      | UNI EN ISO 22718: 2016                                                                                                 |
| Escherichia coli Research                                             | UNI EN ISO 21150: 2016                                                                                                 |
| Candida albicans Research                                             | UNI EN ISO 18416: 2016+ EC 1-2017                                                                                      |
| Salmonella research in 10 gr. Ph. Eur                                 | Ph. Eur. 2,6,13 curr. Ed                                                                                               |
| Search for Listeria monocytogenes in 10g                              | UNI EN ISO 11290-1:2017                                                                                                |
| <b>GENERAL CHEMICAL-ANALYTICAL</b>                                    |                                                                                                                        |
| Aspect                                                                | Visible rating                                                                                                         |
| Color                                                                 | Visible rating                                                                                                         |
| Smell                                                                 | Visible rating                                                                                                         |
| Solubility                                                            |                                                                                                                        |
| ph                                                                    | pH meter                                                                                                               |
| Density                                                               | Densimeter                                                                                                             |
| Refractive index                                                      | Refractometer                                                                                                          |
| Dry residue (105°C, 1h)                                               | UNI ISO 5725-5:2004 e ISO 13528:2005.                                                                                  |
| <b>CHIMICO ANALITICO SPECIFICO – CARATTERIZZAZIONE TOTALE</b>         |                                                                                                                        |
| Glycolic acid, titre                                                  | J.Chrom. A, 1322, 99.49-53, 2013                                                                                       |
| Collagen (hydroxy-proline x 8)                                        | ISO 3496: 1994                                                                                                         |
| Allantoin, titre                                                      | J.Chrom. A, 1322, 99.49-53, 2013                                                                                       |
| Proteins                                                              | ISO1871:2009                                                                                                           |
| Mucopolysaccharides                                                   | Gravimetry                                                                                                             |
| Elastin                                                               | J.Chrom. A, 1322, 99.49-53, 2013                                                                                       |
| Magnesium (mg)                                                        | M.I.M. 110315/A Rev. 0:2015                                                                                            |
| D-lactic acid                                                         | M.I.M. 01216/A Rev. 0:2016                                                                                             |
| L-lactic acid                                                         | M.I.M. 01216/A Rev. 0:2016                                                                                             |
| Antiprotease                                                          | M.I.M. 01216/A Rev. 0:2016                                                                                             |
| Manganese (Mn)                                                        | M.I.M. 110315/A Rev. 0:2015                                                                                            |
| Vitamins B1 (Thiamine)                                                | M.I.M. 010611/A Rev. 0:2011                                                                                            |
| Vitamins A                                                            | ISTISAN 96/34 pag. 137                                                                                                 |
| Vitamins C                                                            | M.I.M. 050911/A Rev. 0:2011                                                                                            |
| Vitamins E                                                            | ISTISAN 96/34 pag. 137                                                                                                 |
| Vitamins B6                                                           | ISTISAN 96/34 pag. 137                                                                                                 |
| <b>HEAVY METALS ICP-MS DETERMINATIONS 8</b>                           |                                                                                                                        |
| Arsenic ICP-MS                                                        | GC – MS chromatography                                                                                                 |
| Cadmium ICP-MS                                                        | GC – MS chromatography                                                                                                 |

|                                      |                              |
|--------------------------------------|------------------------------|
| Cobalt ICP-MS                        | GC – MS chromatography       |
| Chromium ICP-MS                      | GC – MS chromatography       |
| Mercury ICP-MS                       | GC – MS chromatography       |
| Nickel ICP-MS                        | GC – MS chromatography       |
| Lead ICP-MS                          | GC – MS chromatography       |
| ICP-MS Antimony                      | GC – MS chromatography       |
| <b>PESTICIDES</b>                    |                              |
| Chlorinated pesticides, content      | UNI EN 15662:2018            |
| Organo phosphate pesticides, content | UNI EN 15662:2018            |
| Pyrethroids, content                 | UNI EN 15662:2018            |
| <b>TEST OF CONSERVATIVES</b>         |                              |
| Potassium sorbate, titre             | TMC006 Rev.01 del 07/12/2020 |
| Sodium benzoate, titre               | TMC006 Rev.01 del 07/12/2020 |
